# Supplementary figures and images for: Modeling a Snap-Action, Variable-Delay Switch Controlling Extrinsic Cell Death
Source: PLOS journal article supplement (doi:10.1371/journal.pbio.0060299), 2008-11-26

**A**

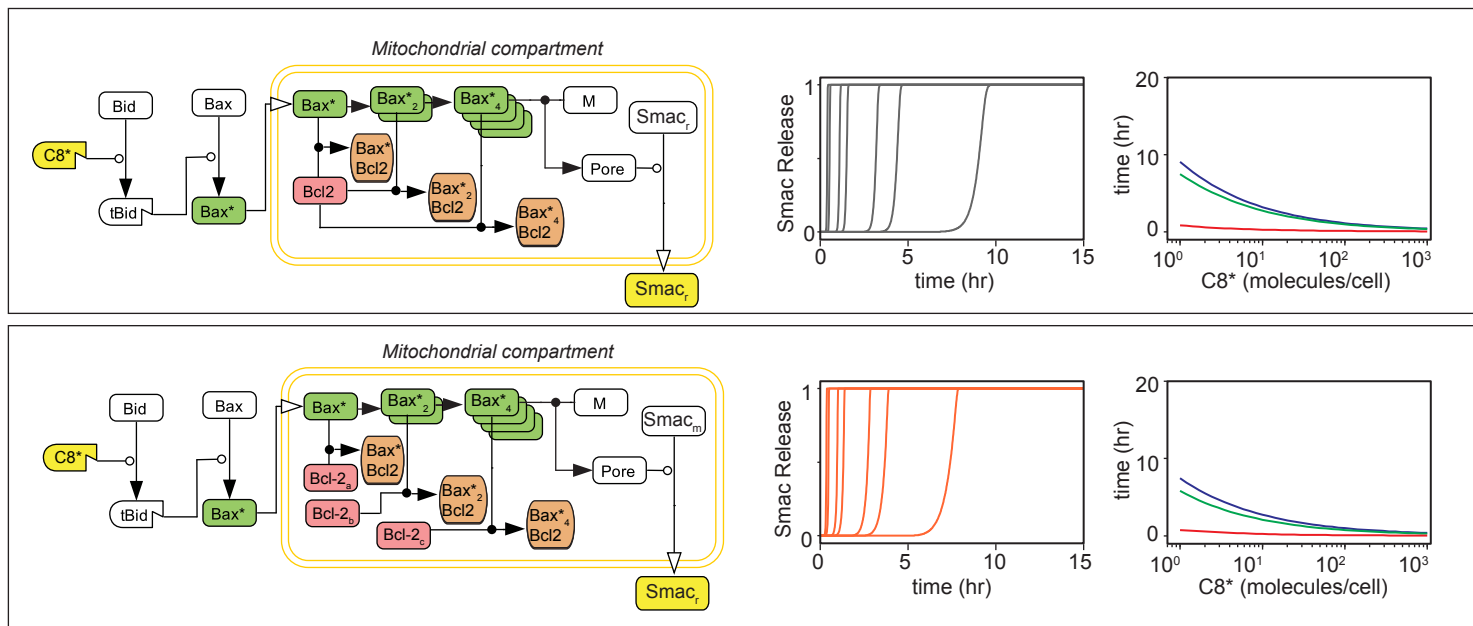

**B**

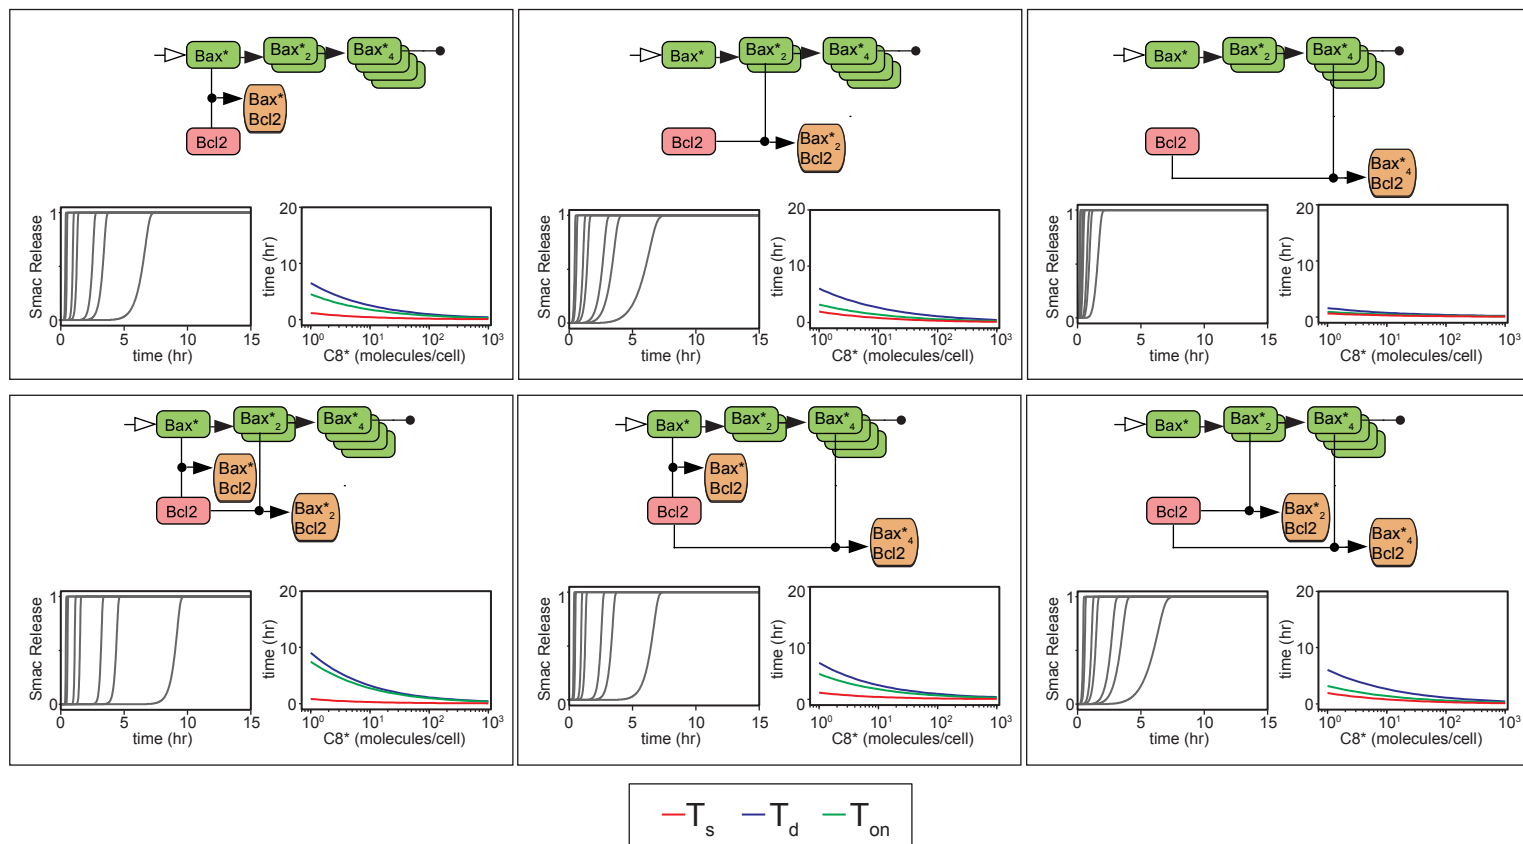

Supplement: S8 (10.1371/journal.pbio.0060299.s008) [file journal.pbio.0060299.s008]
